# Supplementary material
Source: PubMed Central journal article supplement (PMC7477907)
Supplement: NIHMS996011-supplement-Supplement.pdf [file NIHMS996011-supplement-Supplement.pdf]

## Appendix A: RAISE-ETP Sites

| Site Name                                                       | Address                                                     |
|-----------------------------------------------------------------|-------------------------------------------------------------|
| 1. Burrell Behavioral Health (Columbia)                         | 601 Business Loop 70 West, Suite 215,<br>Columbia, MO 65203 |
| 2. Burrell Behavioral Health (Springfield)                      | 1423 N. Jefferson, Ste D-200, Springfield,<br>MO 65802      |
| 3. Catholic Social Services of Washtenaw County                 | 4925 Packard, Ann Arbor, MI 48108-1521                      |
| 4. Center for Rural and Community Behavior<br>Health New Mexico | MSC09 5030, 1 UNM, Albuquerque, NM<br>87131-0001            |
| 5. Cherry Street Health Services                                | 100 Cherry Street SE, Grand Rapids, MI<br>49503             |
| 6. Clinton-Eaton-Ingham Community Mental<br>Health Authority    | 812 E. Jolly Road Ste. G-12, Lansing, MI<br>48910           |
| 7. Cobb County Community Services Board                         | 6133 Love Street, Austell, GA 30168                         |
| 8. Community Alternatives                                       | 3738 Chouteau Ave., Ste. 200 St. Louis, MO<br>63110         |
| 9. Community Mental Health Center of Lancaster<br>County        | 2201 South 17th Street, Lincoln, NE 68502                   |
| 10. Community Mental Health Center, Inc.                        | 427 W. Eads Parkway Lawrenceburg, IN<br>47025               |
| 11. Eyerly Ball Iowa                                            | 1301 Center Street, Des Moines, IA 50309                    |
| 12. Grady Health Systems                                        | 49 Jesse Hill Jr. Drive, SE, Atlanta, GA<br>30303           |

13. Henderson Mental Health Center 4720 North State Road 7, Ft. Lauderdale, FL. 33319
14. Howard Center 300 Flynn Avenue, Burlington, VT 05401
15. Human Development Center 1401 E 1st St Duluth, MN 55805
16. Lehigh Valley Hospital 17th & Chew Sts. 3rd FL, Allentown, PA 18104
17. Life Management Center of Northwest Florida 525 E. 15th St., Panama City, FL 32405
18. Mental Health Center of Denver 4353 E. Colfax Ave., Denver, CO 80220
19. Nashua Mental Health 7 Prospect Street, Nashua, NH 03060
20. North Point Health and Wellness 1313 Penn Ave N, Minneapolis, MN 55411
21. Park Center 909 East State Blvd., Fort Wayne, IN 46805
22. PeaceHealth Oregon/Lane County Behavioral Health Services 2411 MLK Blvd, Eugene, OR 97401
23. Pine Belt Mental HC 103 S. 19th Ave. Hattiesburg, MS 39403
24. River Parish Mental Health Center 1809 W. Airline Hwy LaPlace, LA 70068
25. San Fernando Mental Health Center 10605 Balboa Blvd., Granada Hills, CA 91344
26. Santa Clarita Mental Health Center 23501 Cinema Drive, Valencia, CA 91355
27. South Shore Mental Health Center 4705A Old Post Rd Charlestown, RI 02813
28. St. Clare's Hospital 50 Morris Ave., Denville, NJ 07834
29. Staten Island University Hospital 475 Seaview Ave Staten Island, NY 10305
30. Terrebonne Mental Health Center' 5599 Hwy. 311, Houma, LA 70360
31. The Mental Health Center of Greater 1555 Elm St., Manchester, NH 03101

Manchester

32. The Providence Center

530 North Main Street, Providence, RI

02904

33. United Services

132 Mansfield Ave, Willimantic, CT 06226

34. University of Missouri-Kansas City School of

2464 Charlotte Street, Kansas City, MO

Pharmacy

64108
